# Supplementary figures and images for: Iterative Cellular Screening System for Nanoparticle Safety Testing
Source: Hindawi journal article supplement (doi:10.1155/2015/691069), 2015-01-01

### a NIH-3T3 cells

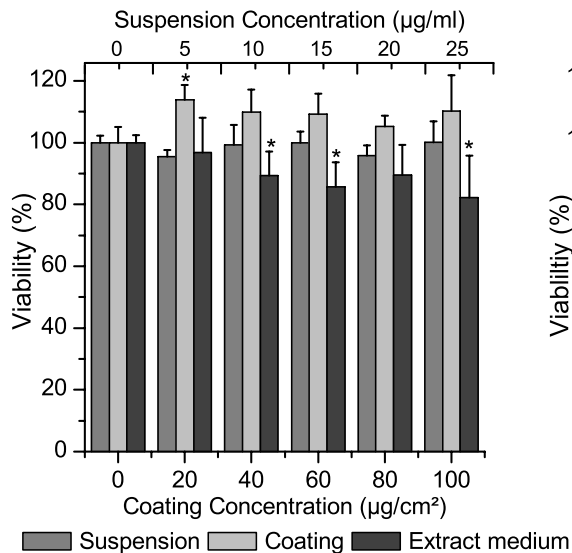

### b A549 cells

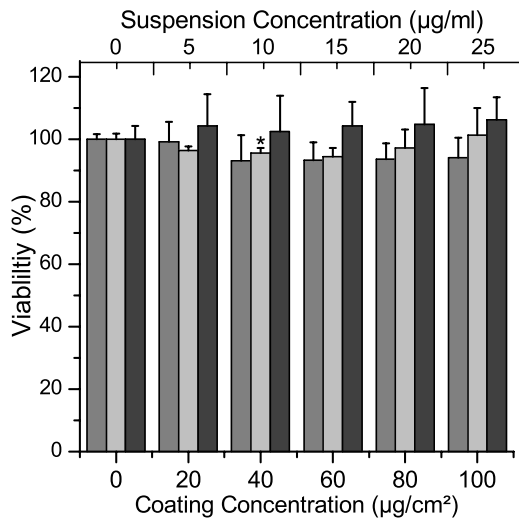

Supplement: f1 [file 691069.f1.pdf]
